# Supplementary material for: Characterization of Sigma 1 Receptor Antagonist CM-304 and Its Analog, AZ-66: Novel Therapeutics Against Allodynia and Induced Pain
Source: PubMed Central journal article supplement (PMC6586922; doi:10.3389/fphar.2019.00678), 2019-06-14
Supplement: DataSheet_1.pdf [file DataSheet_1.pdf]

**Supplemental Figure 1.** Dose- and time-dependent ambulatory effects of i.p. administration of (A) CM-304 or (B) AZ-66 evaluated in the CLAMS assay with C57BL/6J mice. \*=significantly different from vehicle effect (dashed line),  $p < 0.05$ ; two-way ANOVA w/ Dunnett's *post hoc* test. N=7-17 mice/group. **Results expressed as % matching vehicle response.**

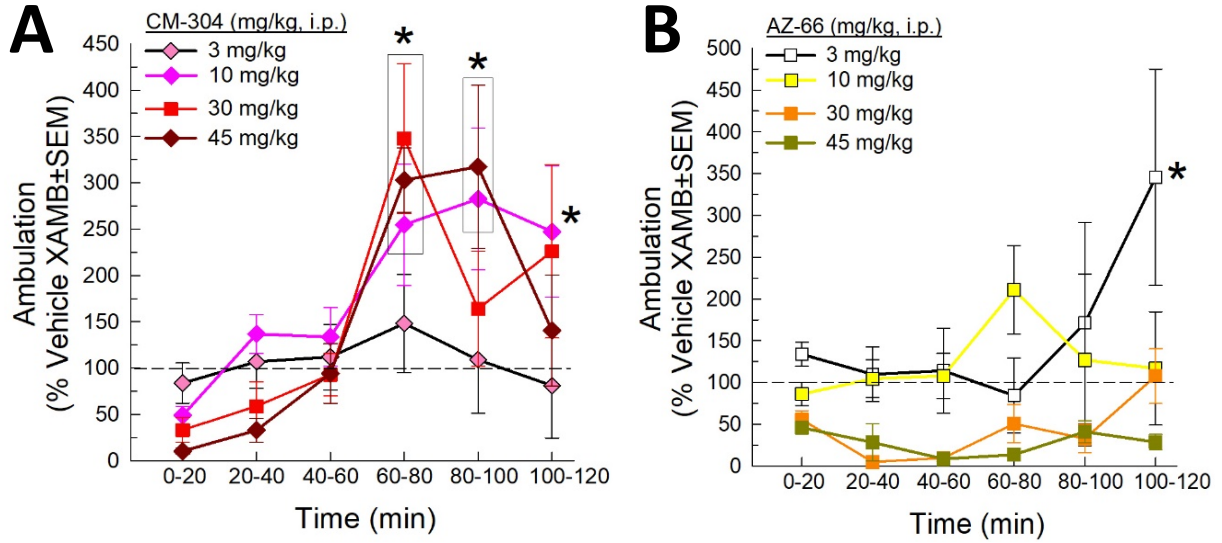

**Supplemental Figure 2.** Dose- and time-dependent ambulatory effects of i.p. administration of (A) Morphine and U50,488, (B) CM-304 or (C) AZ-66 evaluated in the CLAMS assay with C57BL6/J mice. \*=significantly different from vehicle effect (dashed line),  $p < 0.05$ ; two-way ANOVA w/ Dunnett's *post hoc* test.  $N = 16-20$  mice/group for morphine and U50,488, and 7-17 mice/group for CM-304 and AZ-66 testing. **Results are presented as raw ambulatory response, with a separate response of vehicle.**

Two-way ANOVA results (treatment x time):

Morphine:  $F_{(10,270)} = 10.6$ ,  $p < 0.0001$

U50,488:  $F_{(10,258)} = 9.84$ ,  $p < 0.0001$

CM-304:  $F_{(20,345)} = 5.72$ ,  $p < 0.001$

AZ-66:  $F_{(20,265)} = 1.76$ ,  $p = 0.02$

\* $p < 0.05$  or vs. time-matched vehicle response,

Dunnett's multiple comparisons *post hoc* test

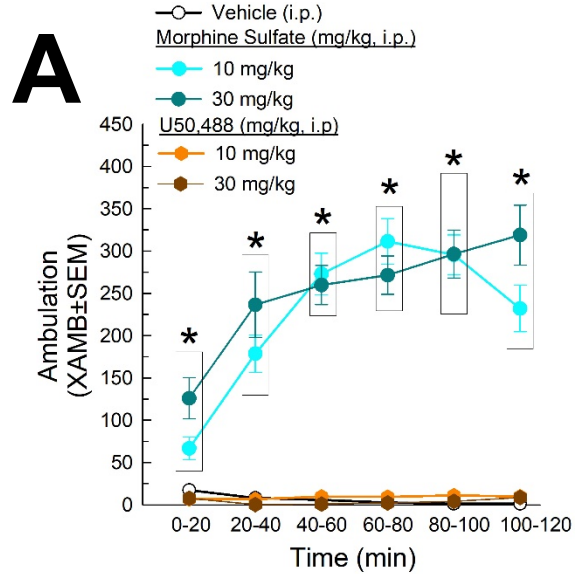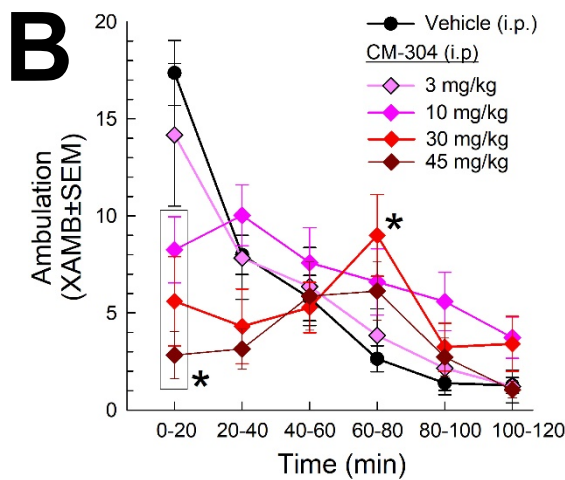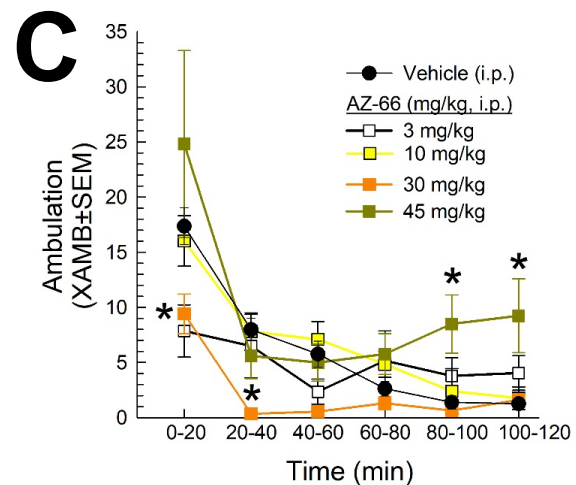

## Supplemental Table 1: Raw place conditioning data collected for CM-304:

C57BL/6J mice: untreated prior to conditioning  
 CM304 (45 mg/kg, i.p.): 2 day counterbalanced place-conditioning design.

| Mouse No: | Wt (g) | Date       | Free-Range Response (AM, no treatment yet) |              |              |             | Treatment (C) (AM) & Box | Free-Range Response (AM):   |              |              |                   |
|-----------|--------|------------|--------------------------------------------|--------------|--------------|-------------|--------------------------|-----------------------------|--------------|--------------|-------------------|
|           |        |            | 304-Box time                               | 304-Box time | between time | 304-Veh Box |                          | 304-Box time                | 304-Box time | between time | 304-Veh Box Diff. |
| 1         | N/A    | 11/17/2014 | 395                                        | 752          | 653          | 357         | Box 2-R                  | mouse died during injection |              |              |                   |
| 2         |        | 11/17/2014 | 658                                        | 730          | 412          | 72          | Box 2-R                  | 544                         | 567          | 689          | 23                |
| 3         |        | 11/17/2014 | 612                                        | 489          | 699          | -123        | Box 2-R                  | 576                         | 261          | 963          | -315              |
| 4         |        | 11/17/2014 | 424                                        | 599          | 777          | 175         | Box 2-R                  | 449                         | 616          | 735          | 167               |
| 5         |        | 11/17/2014 | 667                                        | 357          | 776          | -310        | Box 2-R                  | 508                         | 485          | 807          | -23               |
| 6         |        | 11/17/2014 | 662                                        | 491          | 617          | -201        | Box 2-R                  | 586                         | 735          | 479          | 149               |
| 7         |        | 11/17/2014 | 422                                        | 763          | 615          | 341         | Box 2-R                  | 676                         | 482          | 642          | -194              |
| 8         |        | 11/17/2014 | 625                                        | 552          | 623          | -73         | Box 2-R                  | 653                         | 488          | 659          | -165              |
| 9         |        | 11/17/2014 | 629                                        | 562          | 609          | -67         | Box 1-L                  | 761                         | 464          | 575          | -297              |
| 10        |        | 11/17/2014 | 527                                        | 591          | 682          | 64          | Box 1-L                  | 324                         | 682          | 794          | 358               |
| 11        |        | 11/17/2014 | 530                                        | 398          | 872          | -132        | Box 1-L                  | 378                         | 391          | 1031         | 13                |
| 12        |        | 11/17/2014 | 573                                        | 415          | 812          | -158        | Box 1-L                  | 378                         | 468          | 954          | 90                |
| 13        |        | 11/17/2014 | 293                                        | 675          | 832          | 382         | Box 1-L                  | 197                         | 876          | 727          | 679               |
| 14        |        | 11/17/2014 | 543                                        | 571          | 686          | 28          | Box 1-L                  | mouse died during injection |              |              |                   |
| 15        |        | 11/17/2014 | 514                                        | 508          | 778          | -6          | Box 1-L                  | 578                         | 389          | 833          | -189              |
| 16        |        | 11/17/2014 | 467                                        | 538          | 795          | 71          | Box 1-L                  | 513                         | 275          | 1012         | -238              |
| 17        |        | 11/17/2014 | 594                                        | 516          | 690          | -78         | Box 1-L                  | 644                         | 510          | 646          | -134              |
| 18        |        | 11/17/2014 | 696                                        | 566          | 538          | -130        | Box 1-L                  | 1038                        | 304          | 458          | -734              |
| 19        |        | 11/17/2014 | 409                                        | 601          | 790          | 192         | Box 1-L                  | 409                         | 557          | 834          | 148               |
| 20        |        | 11/17/2014 | 486                                        | 525          | 789          | 39          | Box 1-L                  | 349                         | 278          | 1173         | -71               |
| 21        | N/A    | 11/17/2017 | 773                                        | 528          | 499          | -245        | Box 1-L                  | 1144                        | 288          | 368          | -856              |
| 22        |        | 11/17/2017 | 898                                        | 240          | 662          | -658        | Box 1-L                  | 608                         | 348          | 846          | -262              |
| 23        |        | 11/17/2017 | 829                                        | 317          | 654          | -512        | Box 1-L                  | 603                         | 628          | 569          | 25                |
| 24        |        | 11/17/2017 | 800                                        | 484          | 516          | -316        | Box 1-L                  | 601                         | 627          | 572          | 26                |
| 25        |        | 11/17/2017 | 844                                        | 348          | 608          | -496        | Box 1-L                  | 554                         | 608          | 638          | 54                |
| 26        |        | 11/17/2017 | 636                                        | 467          | 697          | -169        | Box 1-L                  | 484                         | 624          | 692          | 140               |
| 27        |        | 11/17/2017 | 707                                        | 489          | 604          | -218        | Box 1-L                  | 558                         | 544          | 698          | -14               |
| 28        |        | 11/17/2017 | 601                                        | 553          | 646          | -48         | Box 1-L                  | 630                         | 710          | 460          | 80                |
| 29        |        | 11/17/2017 | 697                                        | 601          | 502          | -96         | Box 2-R                  | 480                         | 605          | 715          | 125               |
| 30        |        | 11/17/2017 | 375                                        | 891          | 534          | 516         | Box 2-R                  | 751                         | 472          | 577          | -279              |
| 31        |        | 11/17/2017 | 561                                        | 697          | 542          | 136         | Box 2-R                  | 693                         | 696          | 411          | 3                 |
| 32        |        | 11/17/2017 | 792                                        | 483          | 525          | -309        | Box 2-R                  | 645                         | 333          | 822          | -312              |
| 33        |        | 11/17/2017 | 630                                        | 527          | 643          | -103        | Box 2-R                  | 497                         | 327          | 976          | -170              |
| 34        |        | 11/17/2017 | 480                                        | 513          | 807          | 33          | Box 2-R                  | 369                         | 330          | 1101         | -39               |
| 35        |        | 11/17/2017 | 452                                        | 577          | 771          | 125         | Box 2-R                  | 343                         | 470          | 987          | 127               |
| 36        |        | 11/17/2017 | 562                                        | 565          | 643          | -27         | Box 2-R                  | 810                         | 542          | 448          | -268              |
|           |        |            | 595.08                                     | 541.08       | 663.83       | -54         |                          | 568.56                      | 499.35       | 732.09       | -69.21            |
|           |        |            | 144.73                                     | 129.04       | 112.05       | 250.29      |                          | 191.55                      | 154.48       | 209          | 278.26            |
|           |        |            | 24.12                                      | 21.51        | 18.68        | 41.72       |                          | 32.85                       | 26.49        | 35.84        | 47.72             |
|           |        |            | 36                                         | 36           | 36           | 36          |                          | 34                          | 34           | 34           | 34                |

Explanation of the sample size for this experiment: Two (of 20) mice were lost due to unrelated operator error in making injections in the first test performed in 2014, so these mice were not used in the final analysis (as denoted by the grey highlighting). As initial CM-304 results with these 18 mice failed to show a clear result from the place conditioning tests (Pre-CPP: 3.22+43.24 s vs Post-CPP response of -40.72+71.1 s), whereas AZ-66 showed significant place aversion with 19 mice (losing one of the original 20 due to an unrelated injury), we added 16 more mice to the CM-304 testing to be certain of the absence of a CPP or CPA. As can be seen from the raw data presented here, this additional data did not generate a significantly different result of the original test. To be fully transparent, all data was presented as the final data set.
